# Supplementary material for: Serine-arginine protein kinase 1 (SRPK1) is elevated in gastric cancer and plays oncogenic functions
Source: PubMed Central journal article supplement (PMC5617477; doi:10.18632/oncotarget.18734), 2017-06-28
Supplement: oncotarget-08-61944-s001.pdf [file oncotarget-08-61944-s001.pdf]

## Serine-arginine protein kinase 1 (SRPK1) is elevated in gastric cancer and plays oncogenic functions

### SUPPLEMENTARY MATERIALS

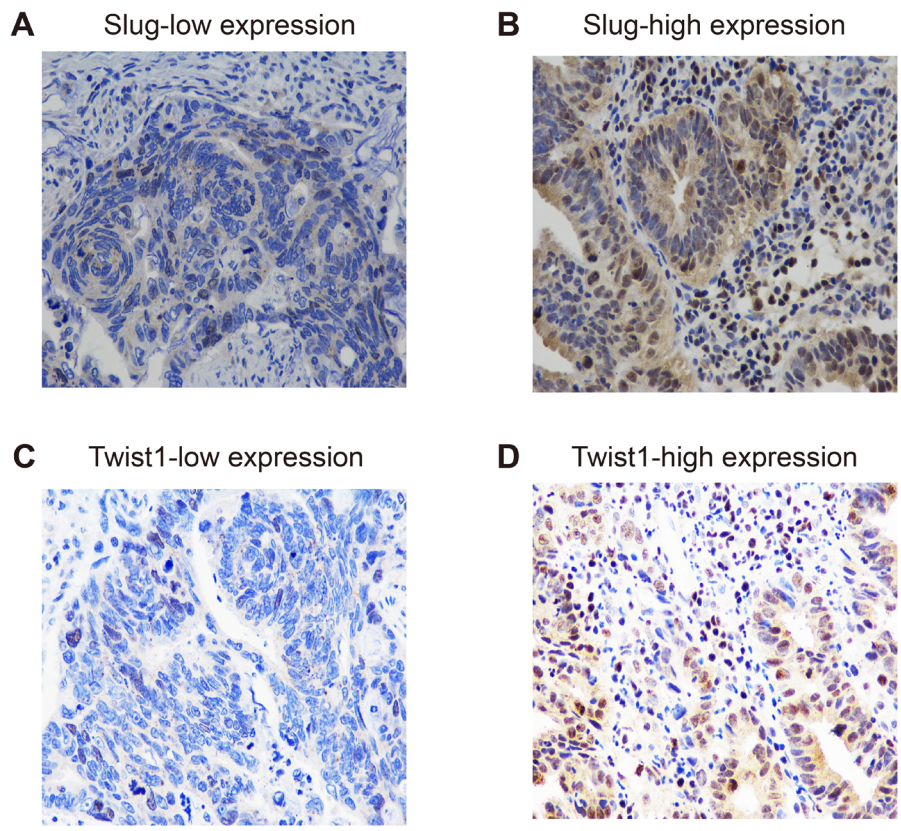

**E** Correlations between SRPK1 and Slug or Twist1 by chi-square test.

|        |      | SRPK1 expression |      | Total | P value |
|--------|------|------------------|------|-------|---------|
|        |      | Low              | High |       |         |
| Slug   | Low  | 39               | 34   | 73    | 0.165   |
|        | High | 36               | 49   | 85    |         |
| Twist1 | Low  | 45               | 32   | 77    | 0.007*  |
|        | High | 30               | 51   | 81    |         |
| Total  |      | 75               | 83   | 158   |         |

**Supplementary Figure 1: Protein expression of Slug and Twist1 in clinical GC tissues.** (A) Representative low expression of Slug. (B) Representative high expression of Slug protein, mainly located in the nucleus. (C) Representative low expression of Twist1. (D) Representative high protein expression of Twist1. (E) Correlations between SRPK1 expression with Slug and Twist1.
